# Supplementary material
Source: MDPI journal article supplement (https://www.mdpi.com/1424-8247/16/1/75)
Supplement: s1 [file s1]

Supplementary material for:

# Identification of novel small molecule ligands for JAK2 pseudokinase domain

Anniina T. Virtanen <sup>1,2,\*</sup>, Teemu Haikarainen <sup>1</sup>, Parthasarathy Sampathkumar <sup>3,4</sup>, Maaria Palmroth <sup>1</sup>, Sanna Liukkonen <sup>1</sup>, Jianping Liu <sup>5,6</sup>, Natalia Nekhotiaeva <sup>6,7</sup>, Stevan R. Hubbard <sup>3</sup> and Olli Silvennoinen <sup>1,2,8,\*</sup>

<sup>1</sup> Faculty of Medicine and Health Technology, Tampere University, 33014 Tampere, Finland

<sup>2</sup> Institute of Biotechnology, HiLIFE Helsinki Institute of Life Science, University of Helsinki, 00014 Helsinki, Finland

<sup>3</sup> Department of Biochemistry and Molecular Pharmacology, New York University Grossman School of Medicine, New York, NY 10016, USA

<sup>4</sup> Surrozen, Inc., South San Francisco, CA 94080, USA

<sup>5</sup> Single Cell Core (SICOF), Department of Medicine Huddinge, Karolinska Institutet, SE-14157 Huddinge, Sweden

<sup>6</sup> Karolinska High Throughput Centre, Department of Biosciences and Nutrition, Karolinska Institutet, SE-14186 Huddinge, Sweden

<sup>7</sup> Science for Life Laboratory, Biochemical and Cellular Assay Facility, Drug Discovery and Development Platform, Department of Biochemistry and Biophysics, Stockholm University, Solna, SE-17121 Stockholm, Sweden

<sup>8</sup> Fimlab Laboratoriot Oy Ltd., 33013 Tampere, Finland

\* Correspondence: anniina.t.virtanen@tuni.fi (A.T.V.); olli.silvennoinen@tuni.fi (O.S.)

## Table of contents:

|                                                                                                      |    |
|------------------------------------------------------------------------------------------------------|----|
| Table S1. Binding of selected hits to wild-type JAK2 pseudokinase domain.....                        | 2  |
| Table S2. Chemical structures of diaminotriazole analogs and binding characteristics.....            | 3  |
| Table S3. Chemical structures of diaminotriazine analogs and binding characteristics.....            | 5  |
| Table S4. Chemical structures of phenylpyrazolo-pyrimidone analogs and binding characteristics. .... | 7  |
| Table S5. Chemical structures of pyrazolyl-formamide analogs and binding characteristics. ....       | 8  |
| Table S6. Effects of compounds on Ba/F3-hJAK2 wildtype and V617F cells .....                         | 9  |
| Table S7. Supplier details on hit compounds of this study.....                                       | 10 |
| Table S8. Product details on hit analogs of this study.....                                          | 11 |
| Table S9. Data collection and refinement statistics. ....                                            | 12 |
| Figure S1. Crystal structures of 23 and 4 with JAK2 JH2 V617F.....                                   | 14 |
| Figure S2. Structural basis for compound selectivity against JAK2 JH1.....                           | 15 |

**Table S1. Binding of selected hits to wild-type JAK2 pseudokinase domain.** Data presented is half-maximal inhibitory concentrations (IC50) of tracer binding to JAK2 JH2 wild-type, average  $\pm$  standard deviation.

| Compound        |           | JAK2 JH2 wt<br>IC50 [ $\mu$ M] |
|-----------------|-----------|--------------------------------|
| Diaminotriazole | <b>1</b>  | $\leq 3.5^1$                   |
|                 | <b>3</b>  | $\leq 3.5^1$                   |
| Diaminotriazine | <b>4</b>  | $94 \pm 28$                    |
|                 | <b>5</b>  | $95 \pm 12$                    |
| Aminopurine     | <b>6</b>  | $\leq 3.5^1$                   |
|                 | <b>7</b>  | $\leq 3.5^1$                   |
|                 | <b>8</b>  | $100 \pm 22$                   |
|                 | <b>9</b>  | $774 \pm 64$                   |
|                 | <b>10</b> | $82 \pm 28$                    |
|                 | <b>11</b> | $192 \pm 41$                   |
|                 | <b>12</b> | $164 \pm 11$                   |
| Other hits      | <b>2</b>  | $19 \pm 2$                     |
|                 | <b>13</b> | $55 \pm 5$                     |
|                 | <b>14</b> | $213 \pm 63$                   |
|                 | <b>15</b> | $82 \pm 16$                    |

<sup>1</sup> at or below lower detection limit of assay.

**Table S2. Chemical structures of diaminotriazole analogs and binding characteristics.** General structure and side chains of the 3,5-diamino-1,2,4-triazole compounds in the study and inhibition-% of tracer binding at 10  $\mu$ M and 100  $\mu$ M concentrations for JAK2 JH2, JAK2 JH2 V617F, JAK2 JH1, and JAK1 JH2.

| Compound       | R1 | R2 | R3 | Inhibition of tracer binding [%] |            |                |            |             |            |             |            |
|----------------|----|----|----|----------------------------------|------------|----------------|------------|-------------|------------|-------------|------------|
|                |    |    |    | JAK2 JH2                         |            | JAK2 JH2 V617F |            | JAK2 JH1    |            | JAK1 JH2    |            |
|                |    |    |    | 100 $\mu$ M                      | 10 $\mu$ M | 100 $\mu$ M    | 10 $\mu$ M | 100 $\mu$ M | 10 $\mu$ M | 100 $\mu$ M | 10 $\mu$ M |
| 1, JNJ-7706621 | H  |    |    | 97                               | 87         | 102            | 76         | 94          | 85         | 94          | 36         |
| 16, analog1    | H  |    |    | 79                               | 36         | 56             | 19         | 86          | 64         | 79          | 30         |
| 17, analog2    | H  | H  |    | 40                               | 9          | 48             | 17         | 21          | 4          | 76          | 30         |
| 18, analog3    | H  | H  |    | 66                               | 14         | 71             | 16         | 36          | 2          | 85          | 37         |
| analog4        |    | H  |    | 9                                | 10         | 5              | 3          | 3           | 0          | 16          | 12         |
| analog5        |    | H  |    | 10                               | 10         | 0              | 0          | 0           | 8          | 11          | 5          |
| analog6        |    |    |    | 5                                | 0          | 5              | 10         | 10          | 1          | 13          | 10         |
| analog7        |    |    |    | 0                                | 0          | 10             | 0          | 8           | 5          | 6           | 7          |
| analog8        |    |    |    | 11                               | 9          | 5              | 0          | 0           | 5          | 9           | 9          |
| analog9        | H  |    |    | 0                                | 0          | 0              | 0          | 3           | 1          | 0           | 0          |
| analog10       | H  |    |    | 0                                | 0          | 0              | 0          | 3           | 3          | 14          | 0          |
| 19, analog11   |    | H  |    | 57                               | 33         | 77             | 44         | 86          | 56         | 110         | 74         |

Table S2. Chemical structures of diaminotriazole analogs and binding characteristics. Continued

| Compound     | R1                                                                                | R2 | R3                                                                                | Inhibition of tracer binding [%] |       |                |       |          |       |          |       |
|--------------|-----------------------------------------------------------------------------------|----|-----------------------------------------------------------------------------------|----------------------------------|-------|----------------|-------|----------|-------|----------|-------|
|              |                                                                                   |    |                                                                                   | JAK2 JH2                         |       | JAK2 JH2 V617F |       | JAK2 JH1 |       | JAK1 JH2 |       |
|              |                                                                                   |    |                                                                                   | 100 μM                           | 10 μM | 100 μM         | 10 μM | 100 μM   | 10 μM | 100 μM   | 10 μM |
| analog12     |  | H  |  |                                  |       |                |       |          |       |          |       |
|              |                                                                                   |    |                                                                                   | 0                                | 0     | 0              | 2     | 20       | 15    | 21       | 16    |
| 20, analog13 | H                                                                                 | H  |  |                                  |       |                |       |          |       |          |       |
|              |                                                                                   |    |                                                                                   | 55                               | 16    | 57             | 10    | 19       | 6     | 78       | 36    |
| 21, analog14 | H                                                                                 | H  |  |                                  |       |                |       |          |       |          |       |
|              |                                                                                   |    |                                                                                   | 45                               | 9     | 45             | 11    | 27       | 16    | 79       | 36    |
| 22, analog15 | H                                                                                 | H  |  |                                  |       |                |       |          |       |          |       |
|              |                                                                                   |    |                                                                                   | 1                                | 0     | 0              | 5     | 10       | 9     | 5        | 4     |

**Table S3. Chemical structures of diaminotriazine analogs and binding characteristics.** General structure and side chains of the 2,4-diamino-1,3,5-triazine compounds in the study and inhibition-% of tracer binding at 10  $\mu$ M and 100  $\mu$ M concentrations for JAK2 JH2, JAK2 JH2 V617F, JAK2 JH1, and JAK1 JH2.

|               |    |    | Inhibition of tracer binding [%] |            |                |            |             |            |             |            |
|---------------|----|----|----------------------------------|------------|----------------|------------|-------------|------------|-------------|------------|
| Compound      | R1 | R2 | JAK2 JH2                         |            | JAK2 JH2 V617F |            | JAK2 JH1    |            | JAK1 JH2    |            |
|               |    |    | 100 $\mu$ M                      | 10 $\mu$ M | 100 $\mu$ M    | 10 $\mu$ M | 100 $\mu$ M | 10 $\mu$ M | 100 $\mu$ M | 10 $\mu$ M |
| 4, CB_7644166 |    |    | 60                               | 29         | 77             | 32         | 5           | 0          | 93          | 54         |
| 5, Z90271204  |    |    | 60                               | 25         | 68             | 22         | 5           | 3          | 68          | 23         |
| 23, analog1   |    |    | 66                               | 29         | 50             | 32         | 0           | 14         | 89          | 35         |
| analog2       |    |    | 24                               | 0          | 33             | 13         | 0           | 0          | 60          | 21         |
| 24, analog3   |    |    | 85                               | 32         | 90             | 35         | 13          | 5          | 99          | 42         |
| 25, analog4   |    |    | 62                               | 20         | 65             | 27         | 7           | 11         | 76          | 35         |
| 26, analog5   |    |    | 56                               | 12         | 70             | 7          | 0           | 0          | 79          | 40         |
| 27, analog6   |    |    | 62                               | 0          | 31             | 3          | 0           | 0          | 72          | 3          |
| 28, analog7   |    |    | 69                               | 14         | 73             | 30         | 4           | 6          | 91          | 35         |
| 29, analog8   |    |    | 31                               | 11         | 38             | 2          | 3           | 0          | 98          | 48         |
| 30, analog9   |    |    | 57                               | 12         | 74             | 13         | 31          | 0          | 99          | 50         |
| 31, analog10  |    |    | 37                               | 3          | 43             | 16         | 11          | 0          | 86          | 40         |

Table S3. Chemical structures of diaminotriazine analogs and binding characteristics. Continued

| Compound     | R1                                                                                  | R2                                                                                  | Inhibition of tracer binding [%] |            |                |            |             |            |             |            |
|--------------|-------------------------------------------------------------------------------------|-------------------------------------------------------------------------------------|----------------------------------|------------|----------------|------------|-------------|------------|-------------|------------|
|              |                                                                                     |                                                                                     | JAK2 JH2                         |            | JAK2 JH2 V617F |            | JAK2 JH1    |            | JAK1 JH2    |            |
|              |                                                                                     |                                                                                     | 100 $\mu$ M                      | 10 $\mu$ M | 100 $\mu$ M    | 10 $\mu$ M | 100 $\mu$ M | 10 $\mu$ M | 100 $\mu$ M | 10 $\mu$ M |
| 32, analog11 |    |    | 56                               | 21         | 59             | 18         | 18          | 0          | 90          | 58         |
| analog12     |    |    | 26                               | 9          | 32             | 7          | 0           | 0          | 80          | 29         |
| analog13     |    |    | 0                                | 0          | 0              | 0          | 0           | 6          | 0           | 0          |
| analog14     |    |    | 0                                | 8          | 0              | 0          | 0           | 3          | 0           | 12         |
| analog15     |    |    | 0                                | 7          | 0              | 0          | 5           | 13         | 0           | 3          |
| analog16     |   |   | 0                                | 2          | 0              | 2          | 12          | 13         | 14          | 16         |
| analog17     |  |  | 1                                | 7          | 6              | 7          | 9           | 14         | 16          | 29         |
| analog18     |  |  | 13                               | 0          | 1              | 0          | 5           | 0          | 55          | 9          |
| analog19     |  |  | 3                                | 2          | 0              | 0          | 3           | 5          | 4           | 0          |
| analog20     |  |  | 0                                | 0          | 0              | 0          | 0           | 0          | 0           | 0          |
| analog21     |  |  | 4                                | 0          | 1              | 0          | 4           | 4          | 27          | 1          |
| analog22     |  |  | 7                                | 0          | 10             | 0          | 7           | 6          | 48          | 14         |
| analog23     |  |  | 0                                | 0          | 0              | 1          | 7           | 11         | 27          | 17         |
| 33, analog24 |  |  | 30                               | 5          | 35             | 5          | 40          | 14         | 112         | 49         |

**Table S4. Chemical structures of phenylpyrazolo-pyrimidone analogs and binding characteristics.** General structure and side chains of the 3-phenylpyrazolo[1,5-a]pyrimidin-7(1H)-one compounds in the study and inhibition-% of tracer binding at 10  $\mu$ M and 100  $\mu$ M concentrations for JAK2 JH2, JAK2 JH2 V617F, JAK2 JH1, and JAK1 JH2.

| Compound     | R1 | R2 | R3 | Inhibition of tracer binding [%] |            |                |            |             |            |             |            |
|--------------|----|----|----|----------------------------------|------------|----------------|------------|-------------|------------|-------------|------------|
|              |    |    |    | JAK2 JH2                         |            | JAK2 JH2 V617F |            | JAK2 JH1    |            | JAK1 JH2    |            |
|              |    |    |    | 100 $\mu$ M                      | 10 $\mu$ M | 100 $\mu$ M    | 10 $\mu$ M | 100 $\mu$ M | 10 $\mu$ M | 100 $\mu$ M | 10 $\mu$ M |
| 13, HTS01632 |    |    |    | 85                               | 27         | 68             | 19         | 15          | 8          | 84          | 21         |
| 34, analog1  |    | H  |    | 83                               | 30         | 77             | 22         | 25          | 5          | 71          | 19         |
| 35, analog2  |    |    |    | 71                               | 23         | 67             | 8          | 10          | 2          | 58          | 22         |
| 36, analog3  |    | H  |    | 70                               | 30         | 53             | 10         | 28          | 0          | 56          | 18         |
| 37, analog4  |    | H  |    | 1                                | 1          | 0              | 0          | 1           | 0          | 19          | 11         |
| 38, analog5  |    |    |    | 0                                | 0          | 0              | 0          | 0           | 10         | 7           | 10         |
| 39, analog6  |    |    |    | 0                                | 3          | 6              | 0          | 13          | 10         | 0           | 10         |
| 40, analog7  |    | H  |    | 8                                | 0          | 0              | 2          | 8           | 9          | 38          | 13         |
| 41, analog8  |    | H  |    | 6                                | 3          | 5              | 6          | 34          | 10         | 24          | 12         |
| 42, analog9  |    | H  |    | 18                               | 3          | 15             | 4          | 27          | 14         | 31          | 24         |

**Table S5. Chemical structures of pyrazolyl-formamide analogs and binding characteristics.** General structure and side chains of N-(1H-pyrazol-4-yl)formamide compounds in the study and and inhibition-% of tracer binding at 10  $\mu$ M and 100  $\mu$ M concentrations for JAK2 JH2, JAK2 JH2 V617F, JAK2 JH1, and JAK1 JH2.

| Compound   | R1 | R2 | Inhibition of tracer binding [%] |            |                |            |             |            |             |            |
|------------|----|----|----------------------------------|------------|----------------|------------|-------------|------------|-------------|------------|
|            |    |    | JAK2 JH2                         |            | JAK2 JH2 V617F |            | JAK2 JH1    |            | JAK1 JH2    |            |
|            |    |    | 100 $\mu$ M                      | 10 $\mu$ M | 100 $\mu$ M    | 10 $\mu$ M | 100 $\mu$ M | 10 $\mu$ M | 100 $\mu$ M | 10 $\mu$ M |
| 2, AT-9283 |    |    | 90                               | 48         | 83             | 47         | 92          | 95         | 98          | 63         |
| analog1    |    |    | 10                               | 5          | 0              | 4          | 79          | 42         | 61          | 21         |
| analog2    |    |    | 6                                | 13         | 0              | 8          | 71          | 39         | 89          | 42         |
| analog3    |    |    | 12                               | 9          | 10             | 4          | 78          | 51         | 38          | 13         |
| analog4    |    |    | 22                               | 14         | 9              | 7          | 83          | 46         | 68          | 33         |
| analog5    |    |    | 48                               | 27         | 28             | 0          | 76          | 67         | 68          | 9          |
| analog6    |    |    | 15                               | 11         | 2              | 6          | 60          | 28         | 79          | 28         |
| analog7    |    |    | 46                               | 6          | 36             | 5          | 74          | 23         | 53          | 18         |
| analog8    | H  |    | 0                                | 4          | 2              | 9          | 17          | 15         | 16          | 23         |
| analog9    |    |    | 14                               | 3          | 0              | 0          | 102         | 61         | 94          | 34         |



**Table S6. Effects of compounds on Ba/F3-hJAK2 wildtype and V617F cells.** Data is presented as IC50 [μM] of cell viability obtained by fitting dose vs. normalized response across multiple replica data sets (n=3).

| Compound                      |           | Cell viability<br>IC50 [μM] |                       |
|-------------------------------|-----------|-----------------------------|-----------------------|
|                               |           | Ba/F3-<br>hJAK2 wt          | Ba/F3-<br>hJAK2 V617F |
| Diaminotriazole               | <b>1</b>  | 2.6                         | 2.7                   |
|                               | <b>18</b> | ND                          | ND                    |
| Diaminotriazine               | <b>4</b>  | ND                          | ND                    |
|                               | <b>24</b> | ND                          | ND                    |
| Aminopurine                   | <b>7</b>  | 0.38                        | 0.48                  |
| Phenylpyrazolo-<br>pyrimidone | <b>34</b> | ND                          | ND                    |
|                               | <b>36</b> | ND                          | ND                    |
| Pyrazolyl-formamide           | <b>2</b>  | 0.33                        | 0.67                  |

ND, inhibition not detected or IC50>40 μM. Compound abbreviations: **1**, JNJ-7706621; **18**, JS-014C; **4**, CB\_7644166; **24**, Z53013220; **7**, Reversine; **34**, HTS02998; **36**, HTS02993; **2**, AT-9283.

**Table S7. Supplier details on hit compounds of this study.**

| <b><i>Compound</i></b>     | <b><i>Supplier</i></b> |
|----------------------------|------------------------|
| JNJ-7706621                | Selleck Chemicals      |
| Cdk1/2 inhibitor III       | Merck Millipore        |
| CB_7644166                 | ChemBridge Corporation |
| Z90271204                  | Enamine Ltd            |
| Cdk2 inhibitor IV (NU6140) | Merck Millipore        |
| Reversine                  | Cayman Chemical        |
| F0578-0019                 | Life Chemicals         |
| F0578-0023                 | Life Chemicals         |
| F0578-0149                 | Life Chemicals         |
| F0578-0155                 | Life Chemicals         |
| F0578-0135                 | Life Chemicals         |
| AT9283                     | Selleck Chemicals      |
| HTS01632                   | Maybridge, Ltd.        |
| Gandotinib (LY2784544)     | Selleck Chemicals      |
| AZD7762                    | Selleck Chemicals      |

**Table S8. Product details on hit analogs of this study.**

| <b>Analog</b>                     | <b>Product ID</b> | <b>Supplier</b>        |
|-----------------------------------|-------------------|------------------------|
| Diaminotriazole analog1           | R428              | Selleck Chemicals      |
| Diaminotriazole analog2           | TG00127           | Maybridge, Ltd.        |
| Diaminotriazole analog3           | JS-014C           | Key Organics Ltd       |
| Diaminotriazole analog4           | JS-1368           | Key Organics Ltd       |
| Diaminotriazole analog5           | TG00133           | Maybridge, Ltd.        |
| Diaminotriazole analog6           | STK187588         | Vitas M Chemical Ltd   |
| Diaminotriazole analog7           | STK178876         | Vitas M Chemical Ltd   |
| Diaminotriazole analog8           | STK187595         | Vitas M Chemical Ltd   |
| Diaminotriazole analog9           | STK846475         | Vitas M Chemical Ltd   |
| Diaminotriazole analog10          | STK060079         | Vitas M Chemical Ltd   |
| Diaminotriazole analog11          | TG00130           | Maybridge, Ltd.        |
| Diaminotriazole analog12          | AE-484/30082023   | Specs                  |
| Diaminotriazole analog13          | JS-158C           | Key Organics Ltd       |
| Diaminotriazole analog14          | TG00124           | Maybridge, Ltd.        |
| Diaminotriazole analog15          | F235-0452         | ChemDiv, Inc.          |
| Diaminotriazine analog1           | Z53013220         | Enamine Ltd            |
| Diaminotriazine analog2           | Z52738116         | Enamine Ltd            |
| Diaminotriazine analog3           | Z90249435         | Enamine Ltd            |
| Diaminotriazine analog4           | Z90228515         | Enamine Ltd            |
| Diaminotriazine analog5           | Z90237919         | Enamine Ltd            |
| Diaminotriazine analog6           | Z90226552         | Enamine Ltd            |
| Diaminotriazine analog7           | Z90223815         | Enamine Ltd            |
| Diaminotriazine analog8           | Z90110078         | Enamine Ltd            |
| Diaminotriazine analog9           | Z193554240        | Enamine Ltd            |
| Diaminotriazine analog10          | Z1403623362       | Enamine Ltd            |
| Diaminotriazine analog11          | Z99558383         | Enamine Ltd            |
| Diaminotriazine analog12          | Z90204970         | Enamine Ltd            |
| Diaminotriazine analog13          | Z89071621         | Enamine Ltd            |
| Diaminotriazine analog14          | Z106434712        | Enamine Ltd            |
| Diaminotriazine analog15          | PB203130188       | UkrOrgSynthesis Ltd    |
| Diaminotriazine analog16          | Z90267928         | Enamine Ltd            |
| Diaminotriazine analog17          | Z89205406         | Enamine Ltd            |
| Diaminotriazine analog18          | Z195726712        | Enamine Ltd            |
| Diaminotriazine analog19          | Z195938424        | Enamine Ltd            |
| Diaminotriazine analog20          | Z1540446168       | Enamine Ltd            |
| Diaminotriazine analog21          | Z198049298        | Enamine Ltd            |
| Diaminotriazine analog22          | Z195616332        | Enamine Ltd            |
| Diaminotriazine analog23          | Z45354386         | Enamine Ltd            |
| Diaminotriazine analog24          | 35080465          | ChemBridge Corporation |
| Phenylpyrazolo-pyrimidone analog1 | HTS02998          | Maybridge, Ltd.        |
| Phenylpyrazolo-pyrimidone analog2 | HTS01428          | Maybridge, Ltd.        |
| Phenylpyrazolo-pyrimidone analog3 | HTS02993          | Maybridge, Ltd.        |
| Phenylpyrazolo-pyrimidone analog4 | 5669620           | ChemBridge Corporation |
| Phenylpyrazolo-pyrimidone analog5 | 5670982           | ChemBridge Corporation |
| Phenylpyrazolo-pyrimidone analog6 | HTS01631          | Maybridge, Ltd.        |
| Phenylpyrazolo-pyrimidone analog7 | HTS02995          | Maybridge, Ltd.        |
| Phenylpyrazolo-pyrimidone analog8 | STK850741         | Vitas M Chemical Ltd   |
| Phenylpyrazolo-pyrimidone analog9 | HTS02994          | Maybridge, Ltd.        |
| Pyrazolyl-formamide analog1       | Z1453153362       | Enamine Ltd            |
| Pyrazolyl-formamide analog2       | Z1567473124       | Enamine Ltd            |
| Pyrazolyl-formamide analog3       | Z1453154041       | Enamine Ltd            |
| Pyrazolyl-formamide analog4       | Z1539628219       | Enamine Ltd            |
| Pyrazolyl-formamide analog5       | Z1539628308       | Enamine Ltd            |
| Pyrazolyl-formamide analog6       | Z1567475331       | Enamine Ltd            |
| Pyrazolyl-formamide analog7       | Z1539628112       | Enamine Ltd            |
| Pyrazolyl-formamide analog8       | Z815279816        | Enamine Ltd            |
| Pyrazolyl-formamide analog9       | Z369935268        | Enamine Ltd            |

**Table S9. Data collection and refinement statistics.**

|                                                     | WT-7 (PDB code 8EX1) | V617F-7 (PDB code 8BAK)                       | WT-6 (PDB code 8EX0) | V617F-6 (PDB code 8B8N)                       |
|-----------------------------------------------------|----------------------|-----------------------------------------------|----------------------|-----------------------------------------------|
| <b>Data</b>                                         |                      |                                               |                      |                                               |
| Beam line                                           | APS 19-BM            | Diamond I03                                   | APS 19-BM            | Diamond I03                                   |
| Wavelength (Å)                                      | 0.9792               | 0.97625                                       | 0.9794               | 0.97625                                       |
| Space group                                         | C2                   | P2 <sub>1</sub> 2 <sub>1</sub> 2 <sub>1</sub> | P2 <sub>1</sub>      | P2 <sub>1</sub> 2 <sub>1</sub> 2 <sub>1</sub> |
| Cell dimensions<br>a, b, c (Å)                      | 91.08, 57.71, 60.75  | 53.28, 56.96, 114.36                          | 43.98, 57.57, 61.18  | 57.07, 61.16, 91.13                           |
| $\alpha$ , $\beta$ , $\gamma$ (°)                   | 90.00, 94.32, 90.00  | 90.00, 90.00, 90.00                           | 90.00, 110.38, 90.00 | 90.00, 90.00, 90.00                           |
| Resolution (Å)                                      | 50-1.50 (1.53-1.50)  | 57-1.65 (1.75-1.65)                           | 29-1.85 (1.88-1.85)  | 45-2.00 (2.12-2.00)                           |
| CC <sub>1/2</sub> (%)                               | 99.9 (89.9)          | 99.9 (48.4)                                   | 99.8 (84.1)          | 99.9 (76.4)                                   |
| <i>I</i> / $\sigma$ <i>I</i>                        | 17.1 (4.0)           | 16.03 (1.20)                                  | 13.9 (3.2)           | 10.11 (1.32)                                  |
| <i>R</i> <sub>merge</sub>                           | 0.055 (0.433)        | 0.067 (1.569)                                 | 0.062 (0.598)        | 0.110 (1.582)                                 |
| Completeness (%)                                    | 99.7 (99.1)          | 100 (99.8)                                    | 99.9 (100)           | 100 (99.9)                                    |
| Redundancy                                          | 4.9 (4.6)            | 7.1 (7.1)                                     | 3.8 (3.7)            | 7.1 (7.3)                                     |
| <b>Refinement</b>                                   |                      |                                               |                      |                                               |
| Reflections                                         | 50203                | 80988                                         | 24548                | 41624                                         |
| <i>R</i> <sub>work</sub> / <i>R</i> <sub>free</sub> | 0.169/0.191          | 0.184/0.207                                   | 0.175/0.228          | 0.209/0.255                                   |
| RMSD of bond lengths (Å)                            | 0.010                | 0.012                                         | 0.011                | 0.004                                         |
| RMSD of bond angles (°)                             | 1.02                 | 0.93                                          | 1.05                 | 0.54                                          |
| <i>B</i> -factors (Å <sup>2</sup> )                 |                      |                                               |                      |                                               |
| Protein                                             | 22.9                 | 39.0                                          | 37.3                 | 68.8                                          |
| Ligand                                              | 16.6                 | 60.5                                          | 36.5                 | 75.6                                          |

Values for the highest-resolution shell are shown in parentheses.

**Table S9. Data collection and refinement statistics. Continued**

|                                                     | WT-36 (PDB code 8EX2) | V617F-36 (PDB code 8B8U) | WT-24 (PDB code 8B9H) | V617F-24 (PDB code 8B9E)                      |
|-----------------------------------------------------|-----------------------|--------------------------|-----------------------|-----------------------------------------------|
| <b>Data</b>                                         |                       |                          |                       |                                               |
| Beam line                                           | APS 19-BM             | Diamond I03              | Diamond I03           | Diamond I03                                   |
| Wavelength (Å)                                      | 0.9792                | 0.97625                  | 0.97625               | 0.97625                                       |
| Space group                                         | C2                    | P1                       | P2 <sub>1</sub>       | P2 <sub>1</sub> 2 <sub>1</sub> 2 <sub>1</sub> |
| Cell dimensions<br>a, b, c (Å)                      | 92.16, 57.42, 60.52   | 46.27, 56.80, 60.65      | 44.18, 57.08, 61.37   | 53.46, 56.55, 114.93                          |
| $\alpha$ , $\beta$ , $\gamma$ (°)                   | 90.00, 94.55, 90.00   | 89.97, 79.14, 71.39      | 90.00, 110.95, 90.00  | 90.00, 90.00, 90.00                           |
| Resolution (Å)                                      | 27-1.90 (1.93-1.90)   | 41-1.50 (1.53-1.50)      | 57-1.50 (1.59-1.50)   | 57-1.50 (1.59-1.50)                           |
| CC <sub>1/2</sub> (%)                               | 99.6 (89.1)           | 99.3 (80.0)              | 99.9 (68.0)           | 99.9 (91.5)                                   |
| <i>I</i> / $\sigma$ <i>I</i>                        | 14.8 (4.1)            | 9.20 (1.10)              | 12.23 (1.05)          | 13.68 (0.77)                                  |
| <i>R</i> <sub>merge</sub>                           | 0.087 (0.629)         | 0.061 (0.849)            | 0.044 (1.006)         | 0.068 (1.310)                                 |
| Completeness (%)                                    | 99.8 (99.8)           | 94.9 (76.2)              | 95.9 (88.7)           | 91.6 (61.5)                                   |
| Redundancy                                          | 4.5 (4.4)             | 3.5 (3.1)                | 3.6 (3.3)             | 6.1 (3.4)                                     |
| <b>Refinement</b>                                   |                       |                          |                       |                                               |
| Reflections                                         | 24886                 | 86906                    | 86138                 | 98868                                         |
| <i>R</i> <sub>work</sub> / <i>R</i> <sub>free</sub> | 0.169/0.203           | 0.222/0.259              | 0.181/0.209           |                                               |
| RMSD of bond lengths (Å)                            | 0.012                 | 0.007                    | 0.009                 | 0.017                                         |
| RMSD of bond angles (°)                             | 1.11                  | 0.89                     | 0.89                  | 1.27                                          |
| <i>B</i> -factors                                   |                       |                          |                       |                                               |
| Protein                                             | 26.6                  | 29.7                     | 37.4                  | 30.5                                          |
| Ligand                                              | 18.9                  | 21.0                     | 32.6                  | 23.0                                          |

Values for the highest-resolution shell are shown in parentheses.

**Table S9. Data collection and refinement statistics. Continued**

|                                                     | WT-16 (PDB code 8BA3) | V617F-16 (PDB code 8BA4) | V671F- 1 (PDB code 8B99)                      | V617F-4 (PDB code 8BAB)                       |
|-----------------------------------------------------|-----------------------|--------------------------|-----------------------------------------------|-----------------------------------------------|
| <b>Data</b>                                         |                       |                          |                                               |                                               |
| Beam line                                           | Diamond I03           | Diamond I03              | Diamond I03                                   | Diamond I03                                   |
| Wavelength (Å)                                      | 0.97625               | 0.97625                  | 0.97625                                       | 0.97625                                       |
| Space group                                         | C2                    | P1                       | P2 <sub>1</sub> 2 <sub>1</sub> 2 <sub>1</sub> | P2 <sub>1</sub> 2 <sub>1</sub> 2 <sub>1</sub> |
| Cell dimensions<br>a, b, c (Å)                      | 78.22, 57.75, 60.63   | 55.57, 57.09, 60.70      | 53.41, 56.72, 114.50                          | 53.24, 56.80, 114.75                          |
| $\alpha$ , $\beta$ , $\gamma$ (°)                   | 90.00, 91.62, 90.00   | 90.06, 116.01, 115.65    | 90.00, 90.00, 90.00                           | 90.00, 90.00, 90.00                           |
| Resolution (Å)                                      | 60-1.4 (1.49-1.40)    | 53-2.10 (2.23-2.10)      | 40-1.60 (1.70-1.60)                           | 57-1.55 (1.64-1.55)                           |
| CC <sub>1/2</sub> (%)                               | 99.9 (43.9)           | 99.5 (46.1)              | 100 (36.5)                                    | 99.9 (63.8)                                   |
| <i>I</i> / $\sigma$ <i>I</i>                        | 12.48 (1.00)          | 6.62 (1.13)              | 16.41 (0.83)                                  | 11.93 (1.42)                                  |
| <i>R</i> <sub>merge</sub>                           | 0.048 (0.761)         | 0.08 (0.701)             | 0.056 (1.486)                                 | 0.095 (1.202)                                 |
| Completeness (%)                                    | 95.1 (72.6)           | 95.3 (95.2)              | 96.6 (81.6)                                   | 99.9 (99.2)                                   |
| Redundancy                                          | 3.3 (2.1)             | 1.8 (1.9)                | 6.6 (4.7)                                     | 7.1 (6.9)                                     |
| <b>Refinement</b>                                   |                       |                          |                                               |                                               |
| Reflections                                         | 99229                 | 65710                    | 85667                                         | 97528                                         |
| <i>R</i> <sub>work</sub> / <i>R</i> <sub>free</sub> | 0.174/0.197           | 0.216/0.274              | 0.189/0.211                                   | 0.175/0.203                                   |
| RMSD of bond lengths (Å)                            | 0.016                 | 0.003                    | 0.006                                         | 0.019                                         |
| RMSD of bond angles (°)                             | 1.27                  | 0.60                     | 0.88                                          | 1.37                                          |
| B-factors                                           |                       |                          |                                               |                                               |
| Protein                                             | 25.5                  | 49.1                     | 34.9                                          | 29.2                                          |
| Ligand                                              | 30.2                  | 66.8                     | 32.6                                          | 24.8                                          |

Values for the highest-resolution shell are shown in parentheses.

**Table S9. Data collection and refinement statistics. Continued**

|                                                     | V617F-23 (PDB code 8BA2)                      |
|-----------------------------------------------------|-----------------------------------------------|
| <b>Data</b>                                         |                                               |
| Beam line                                           | Diamond I03                                   |
| Wavelength (Å)                                      | 0.97625                                       |
| Space group                                         | P2 <sub>1</sub> 2 <sub>1</sub> 2 <sub>1</sub> |
| Cell dimensions<br>a, b, c (Å)                      | 53.24, 56.76, 114.74                          |
| $\alpha$ , $\beta$ , $\gamma$ (°)                   | 90.00, 90.00, 90.00                           |
| Resolution (Å)                                      | 57-1.50 (1.59-1.50)                           |
| CC <sub>1/2</sub> (%)                               | 99.9 (61.9)                                   |
| <i>I</i> / $\sigma$ <i>I</i>                        | 13.64 (1.46)                                  |
| <i>R</i> <sub>merge</sub>                           | 0.075 (1.061)                                 |
| Completeness (%)                                    | 100 (99.8)                                    |
| Redundancy                                          | 6.9 (5.9)                                     |
| <b>Refinement</b>                                   |                                               |
| Reflections                                         | 107715                                        |
| <i>R</i> <sub>work</sub> / <i>R</i> <sub>free</sub> | 0.177/0.204                                   |
| RMSD of bond lengths (Å)                            | 0.016                                         |
| RMSD of bond angles (°)                             | 1.25                                          |
| B-factors                                           |                                               |
| Protein                                             | 26.3                                          |
| Ligand                                              | 20.1                                          |

Values for the highest-resolution shell are shown in parentheses.

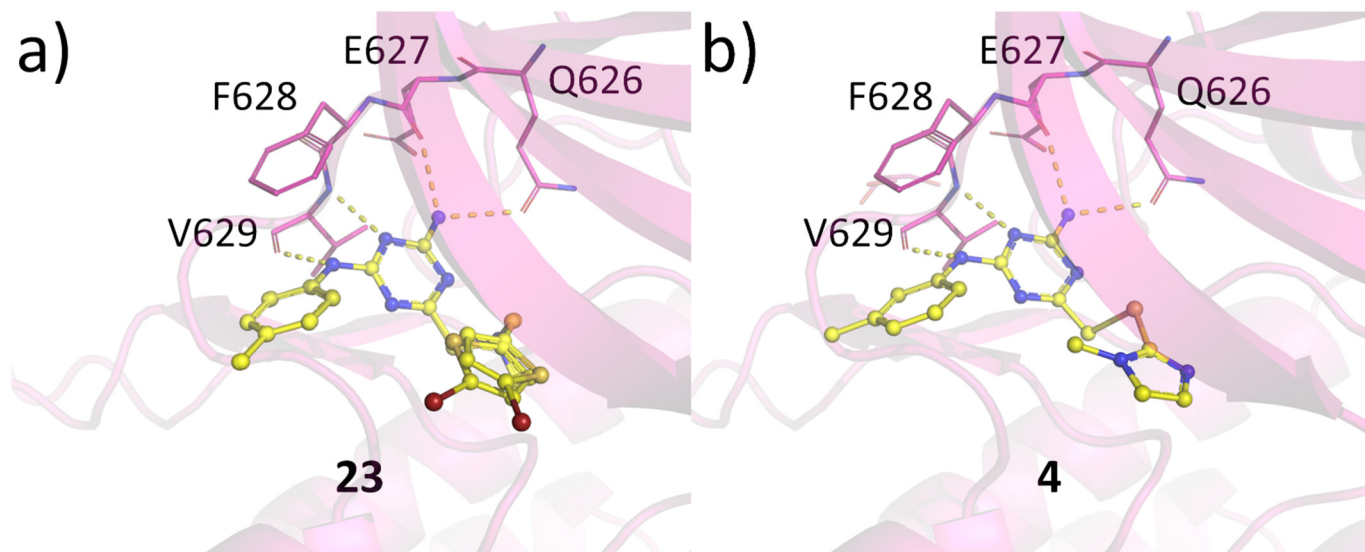

**Figure S1. Crystal structures of 23 and 4 with JAK2 JH2 V617F.** The residues participating in hydrogen bonding are shown as sticks. The hydrogen bonds are shown in yellow dotted lines. a) **23**. b) **4**.

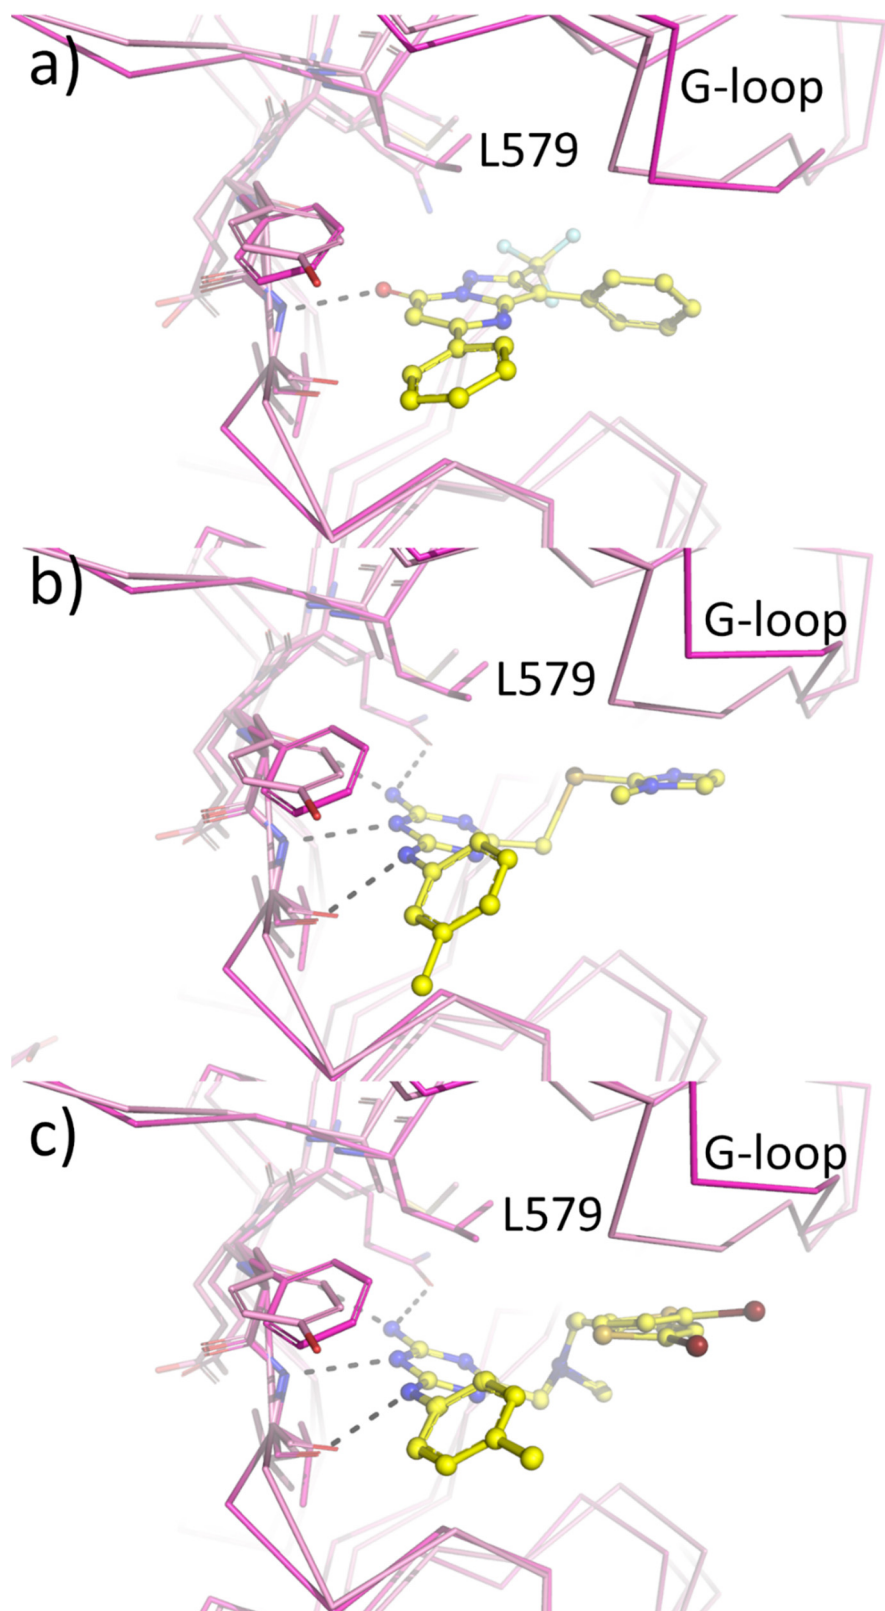

**Figure S2. Structural basis for compound selectivity against JAK2 JH1** (pdb coe 4IVA). a) JAK2 JH2 V617F-**37** superposed with JAK2 JH1. b) JAK2 JH2 V617F-**4** superposed with JAK2 JH1. c) JAK2 JH2 V617F-**23** superposed with JAK2 JH1. JAK2 is colored in magenta and JAK1 is colored in pink. Hydrogen bonds are depicted as dotted lines.
